# Supplementary material for: Impacts of the Marine Hatchery Built Environment, Water and Feed on Mucosal Microbiome Colonization Across Ontogeny in Yellowtail Kingfish, Seriola lalandi
Source: PubMed Central journal article supplement (PMC9563383; doi:10.3389/fmars.2021.676731), 2021-05-13
Supplement: NIHMS1806685-supplement-Supplementary_Material.pdf [file NIHMS1806685-supplement-Supplementary_Material.pdf]

## *Supplementary Material*

>=5000  
reads

Supplemental Table S1. Sample success across sample\_types

| experiment | age | tank        | sample_type  | N  | N_success |
|------------|-----|-------------|--------------|----|-----------|
| 1          | 130 | FT          | gill         | 12 | 12        |
| 1          | 130 |             | skin         | 12 | 9         |
| 1          | 130 |             | tank water   | 1  | 1         |
| 1          | 130 |             | tank side    | 1  | 1         |
| 1          | 130 |             | inlet pipe   | 1  | 1         |
| 1          | 130 |             | air diffuser | 1  | 1         |
| 1          | 130 |             | airstone     | 1  | 1         |
| 1          | 130 | RAS BioGill | gill         | 12 | 11        |
| 1          | 130 |             | skin         | 12 | 11        |
| 1          | 130 |             | inlet water  | 1  | 1         |
| 1          | 130 |             | tank water   | 1  | 0         |
| 1          | 130 |             | tank side    | 1  | 1         |
| 1          | 130 |             | inlet pipe   | 1  | 1         |
| 1          | 130 |             | air diffuser | 1  | 1         |
| 1          | 130 | RAS MBBR    | gill         | 12 | 12        |

Supplementary Material

|   |     |           |              |    |    |
|---|-----|-----------|--------------|----|----|
| 1 | 130 |           | skin         | 12 | 12 |
| 1 | 130 |           | inlet water  | 1  | 1  |
| 1 | 130 |           | tank water   | 1  | 0  |
| 1 | 130 |           | tank side    | 1  | 1  |
| 1 | 130 |           | inlet pipe   | 1  | 1  |
| 1 | 130 |           | air diffuser | 1  | 1  |
| 2 | 43  | WL3 & WL6 | gill         | 12 | 10 |
| 2 | 43  |           | skin         | 12 | 9  |
| 2 | 43  |           | digesta      | 12 | 4  |
| 2 | 43  |           | tank water   | 2  | 2  |
| 2 | 43  |           | tank side    | 2  | 1  |
| 2 | 43  |           | inlet pipe   | 2  | 1  |
| 2 | 43  |           | airstone     | 2  | 1  |
| 2 | 137 | FT        | gill         | 12 | 8  |
| 2 | 137 |           | skin         | 12 | 10 |
| 2 | 137 |           | digesta      | 12 | 8  |
| 2 | 137 |           | tank water   | 1  | 1  |
| 2 | 137 |           | tank side    | 1  | 1  |
| 2 | 137 |           | inlet pipe   | 1  | 1  |
| 2 | 137 |           | air diffuser | 1  | 1  |

|   |     |           |                                 |    |    |
|---|-----|-----------|---------------------------------|----|----|
| 2 | 137 |           | airstone                        | 1  | 1  |
| 2 | 430 | seapen FT | gill                            | 12 | 10 |
| 2 | 430 |           | skin                            | 12 | 10 |
| 2 | 430 |           | digesta                         | 12 | 9  |
| 2 | 430 |           | tank water                      | 1  | 1  |
| 2 | 430 |           | tank side                       | 1  | 0  |
| 2 | 430 |           | inlet pipe                      | 1  | 1  |
| 2 | 430 |           | air diffuser                    | 1  | 1  |
| 2 | 430 | seapen    | gill                            | 20 | 16 |
| 2 | 430 |           | skin                            | 20 | 17 |
| 2 | 430 |           | digesta                         | 20 | 20 |
| 2 |     | feed      | artemia 500ul                   | 1  | 0  |
| 2 |     |           | unenriched rotifer 500ul        | 1  | 1  |
| 2 |     |           | enriched rotifer espresso 500ul | 1  | 1  |
| 2 |     |           | Otohime b1                      | 1  | 1  |
| 2 |     |           | Otohime b2                      | 1  | 1  |
| 2 |     |           | Otohime C1                      | 1  | 1  |
| 2 |     |           | Otohime c2                      | 1  | 1  |
| 2 |     |           | 0.5 mm Nutra feed               | 1  | 1  |
| 2 |     |           | 0.8 mm biomar feed              | 1  | 1  |

|   |       |                     |     |     |
|---|-------|---------------------|-----|-----|
| 2 |       | Ridley 1.5mm        | 1   | 1   |
| 2 |       | Ridley 3 mm         | 1   | 1   |
| 2 |       | Ridley 3 mm w vit c | 1   | 1   |
| 2 |       | Skretting 9mm       | 1   | 1   |
|   | NA    | Negative controls   | 7   | 3   |
|   | NA    | Positive controls   | 12  | 7   |
|   | Total |                     | 304 | 246 |

Table S2. Multivariate statistical comparison of microbial communities by a) impacts of age for each independent body site and b) differences across body sites for each unique age group (PERMANOVA, 999 permutations)

| a | UniFrac | Filtered_group | test_group  | n  | P     | F     |
|---|---------|----------------|-------------|----|-------|-------|
|   | unw     | 43 dph         | sample_type | 29 | 0.001 | 4.62  |
|   | unw     | 137 dph        | sample_type | 26 | 0.023 | 1.29  |
|   | unw     | 430 dph tank   | sample_type | 29 | 0.001 | 4.62  |
|   | unw     | 430 dph sea    | sample_type | 53 | 0.001 | 6.67  |
|   | w       | 43 dph         | sample_type | 29 | 0.001 | 5.57  |
|   | w       | 137 dph        | sample_type | 26 | 0.003 | 3.11  |
|   | w       | 430 dph tank   | sample_type | 29 | 0.001 | 18.39 |
|   | w       | 430 dph sea    | sample_type | 53 | 0.001 | 32.29 |

|       |     |         |                 |    |       |       |
|-------|-----|---------|-----------------|----|-------|-------|
| b     | unw | Gill    | ylk_tank_system | 44 | 0.001 | 5.90  |
|       | unw | Skin    | ylk_tank_system | 46 | 0.001 | 3.51  |
|       | unw | Digesta | ylk_tank_system | 41 | 0.001 | 3.47  |
| <hr/> |     |         |                 |    |       |       |
|       | w   | Gill    | ylk_tank_system | 44 | 0.001 | 14.53 |
|       | w   | Skin    | ylk_tank_system | 46 | 0.001 | 7.72  |
|       | w   | Digesta | ylk_tank_system | 41 | 0.001 | 6.78  |
| <hr/> |     |         |                 |    |       |       |

UniFrac: unweighted unfrac = 'unw', weighed normalized unfrac = 'w'

ylk\_tank\_system: 43 dph, 137 dph, 430 dph 'tank', 430 dph 'seapen'

sample\_type: fish gill, fish skin, fish gut

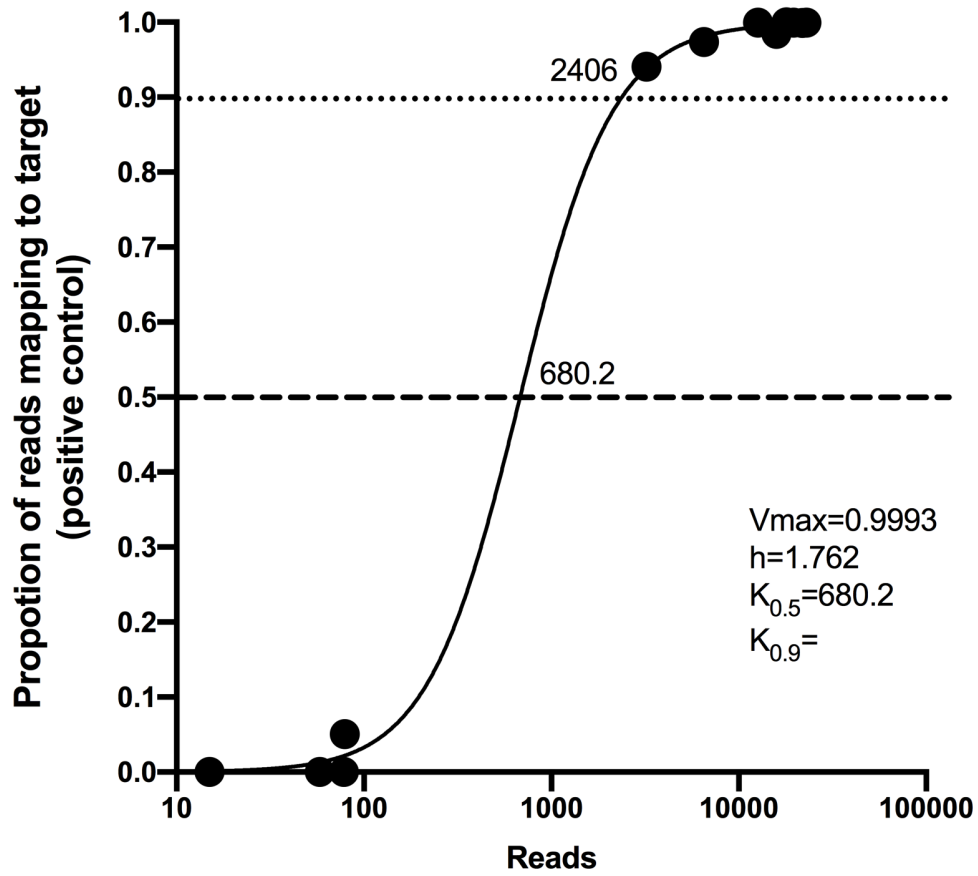

**Supplementary Figure 1.** Sample exclusion cutoff determination using Katharoseq method for limit of detection.

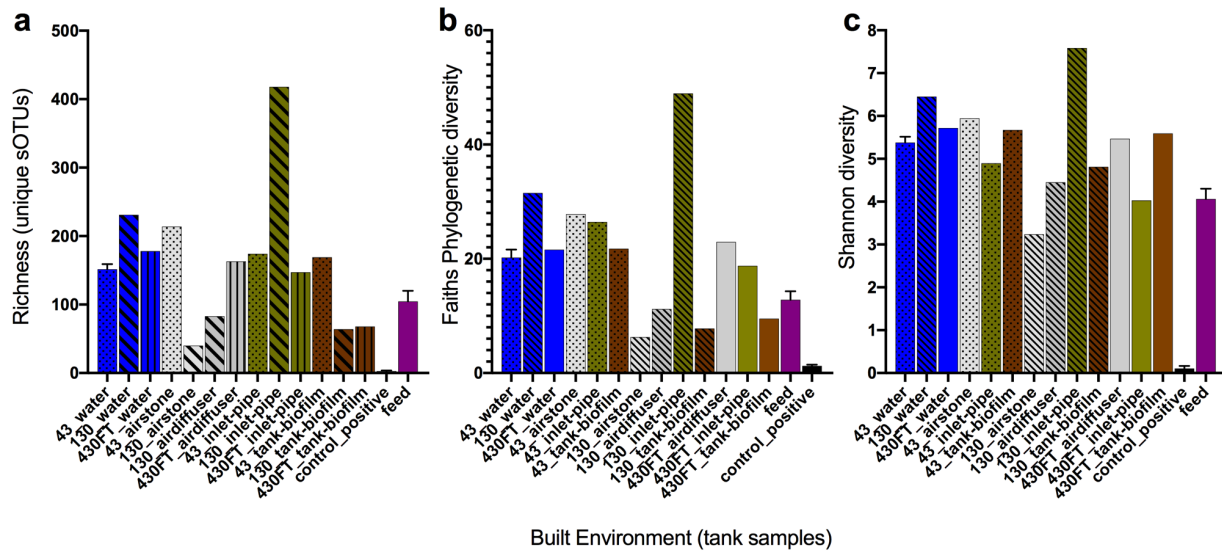

**Supplementary Figure 2.** Alpha diversity measures a) richness, b) Faith's Phylogenetic diversity, and c) Shannon across hatchery surfaces

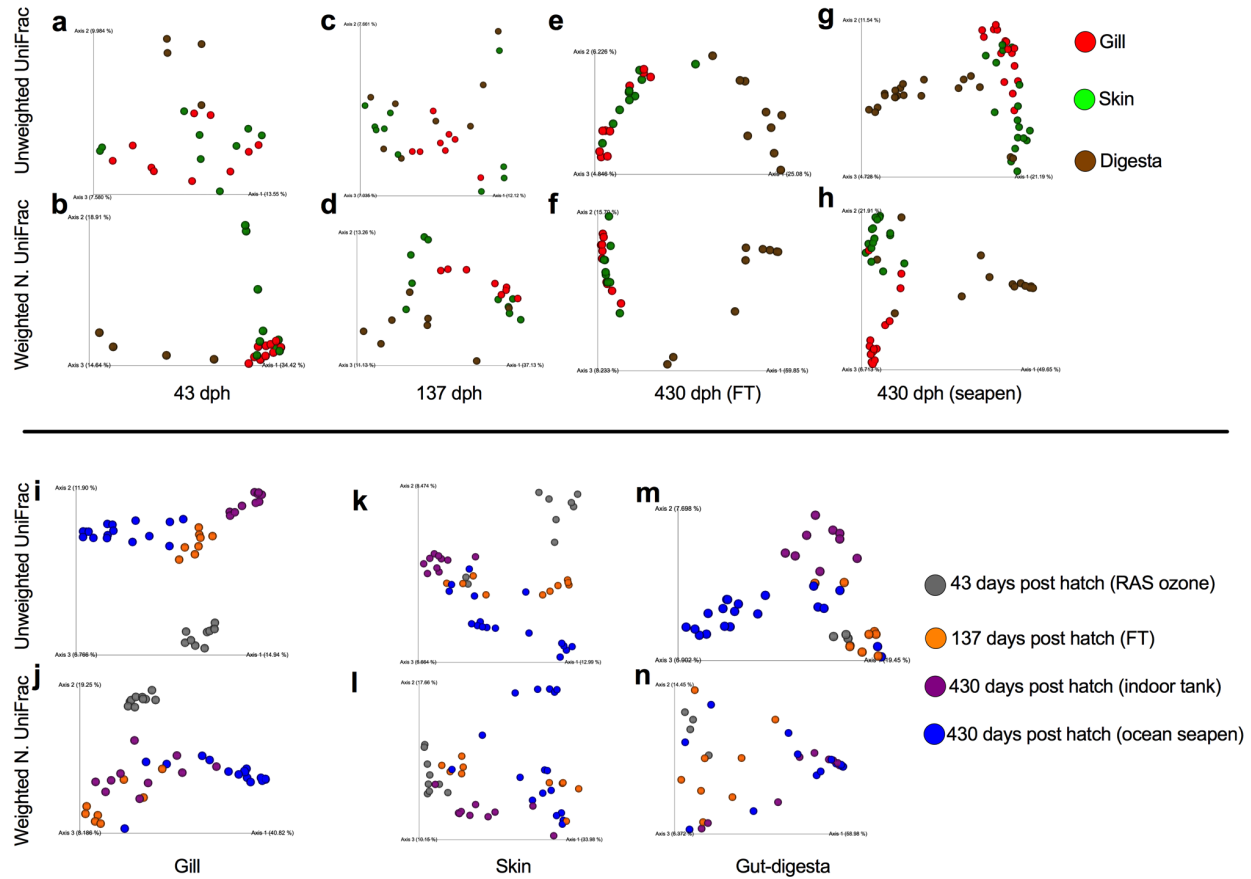

**Supplementary Figure 3.** Beta diversity visualizations using PCoA plots of both Unweighted and Weighted Normalized Unifrac distances. Comparisons of microbial diversity across body sites using Unweighted and Weighted Unifrac distances (respectfully) independently for each age group: a) b) 43 dph; c) d) 137 dph; e) f) 430 dph indoor tank; g) h) 430 dph seapen. Comparisons of microbial diversity across rearing conditions or age using Unweighted and Weighted Unifrac distances grouped independently for body sites: i) j) gill; k) l) skin; m) n) digesta.





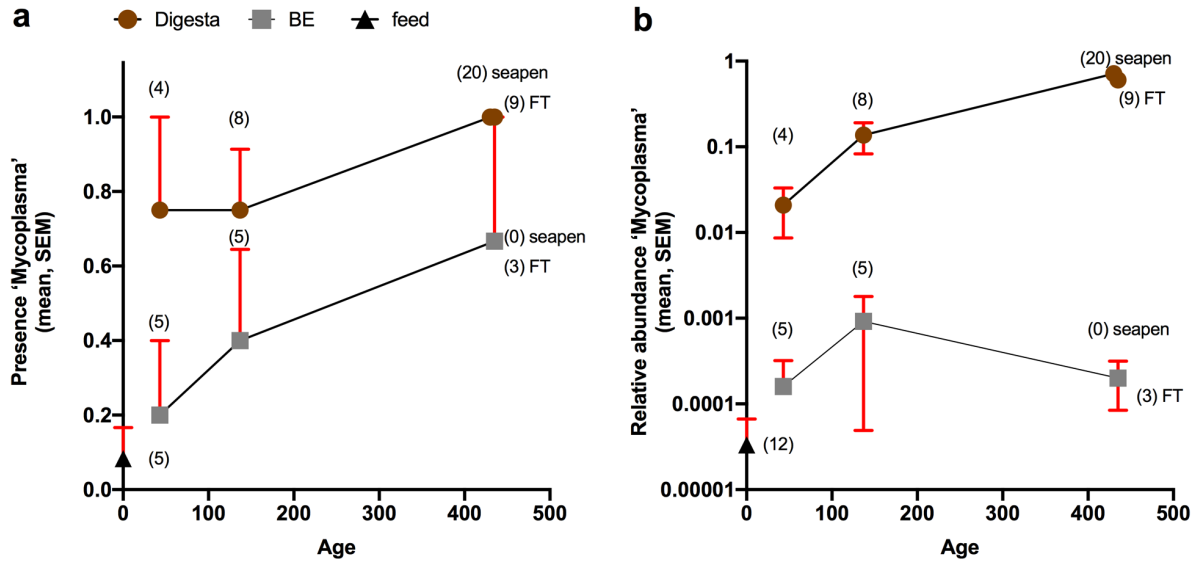

**Supplementary Figure 5.** Distribution of highly abundant 'unannotated' Mycoplasmataceae in digesta and built environment samples across fish age. A) Presence and B) relative abundance distribution of Mycoplasmataceae in fish and environment samples.
